# Supplementary material for: Block-structured, equal workload, multigrid nesting interface for Boussinesq wave model FUNWAVE-TVD
Source: Copernicus journal article supplement (doi:10.5194/egusphere-2022-35), 2022-04-04
Supplement: Supplementary file [file egusphere-2022-35-AC2-supplement.pdf]

We would like to thank the reviewer for detailed suggestions and comments which are constructive and helpful for improving the paper quality. In the following responses, the reviewer's questions are printed in black and our responses are in blue. In the revised manuscript, the changes are highlighted in red.

## **Response to Reviewer 2**

### **General Comments:**

Transoceanic tsunamis may cause serious damages to the highly populated coastal areas, such that early warnings based on the forecast of tsunami considering its coastal impact are very important. Using multi-grid nesting, this paper presents a very promising numerical tool which could simultaneously simulate the evolution of tsunami at the oceanic basin-scale with a coarse grid and the coastal inundation in the nearshore-scale with a finer grid. The four different tests demonstrate this capability impressively. The paper is well-written, and the organization of content is great. However, if the author could present more information about the background of FUNWAVE-TVD, more details about the grid/memory management, and more results about model accuracy/efficiency will improve readers' understanding about the equal workload, multigrid nesting interface. My suggestions are given as below.

Reply: As we can understand from the general comments and the following specific comments, the reviewer suggested clarifying and providing more details in some critical techniques used in the development. We think that this suggestion is in line with the general comment from Reviewer 1. In this revision, we added some explanations and clarifications related to the techniques mentioned by both of the reviewers, such as memory management and equal workload algorithm. As suggested by the reviewer, we carried out an extra test in the case of the rectangular hump using a high resolution, single grid configuration. We found that the result is interesting and good to be added in the paper. We also made an effort on correcting figures and texts following the detailed comments from the reviewer.

**Specific Comments:**

1. Introduction (section 1) is not well-organized or lack of some information. Part of this is explained in “Technical Corrections”. My suggestion is to re-organize the content following this manner: a) governing equations and explain why choose the dispersive ones. I have the same feeling as the other reviewer that the author needs to explain the need of finer grid and the relation to dispersion property more clearly; b) techniques for multi-scale tsunami modeling, including AMR and nested grids. First, introduce the AMR and why it is not ok for your governing equations; c) Second, introduce nested grids with figure 1; d) for nested grids, why two-way nesting is necessary or useful; e) summarize what has been done/ innovations (interpolator/restriction operator, data management, etc...) of this work.

Reply: We appreciate the ‘Technical Corrections’ provided by the reviewer. Our corrections are attached at the end of the letter. Following the reviewer’s suggestion, we reorganized the introduction section in order of dispersion importance → nesting techniques → work in this study. We emphasized that, 1) the Boussinesq model is more appropriate model relative to other types of dispersive wave model in tsunami simulations, 2) why two-way nesting is necessary, and 3) an equal-load scheme in workload balance and a strategy of shared array allocation for data management. Since some AMR techniques are closely related to the two-way nesting method, we decided to introduce the nesting method prior to the AMR methods. FUNWAVE equations are also good for AMR. We mentioned that the development of the AMR algorithm is left for future work (see conclusion section).

2. Section 2 (FUNWAVE-TVD). First, it could be better to move lines 150-160 here and add a subsection just for the development relating to FUNWAVE. Second, use one paragraph in section 2.1 (no need to separate the content). Third, section 2.2 is over-simplified. Even though this part is not that important in this paper, enough information about the numerical schemes used by FUNWAVE-TVD is necessary. What’s more, one thing should be explained is that the core program FUNWAVE-TVD only needs a grid (parent or child), an initial condition, and the boundary conditions in ghost cells to launch. This is necessary as a precondition

for the multi-grid nesting interface. Last, use a figure similar to figure 3 to explain the penalization and ghost cells in section 2.3.

Reply: We agree with the reviewer that section 2 should be better organized. We combined the mentioned paragraph and the first paragraph of section 2 into a new subsection 2.1. In the numerical scheme subsection, we mentioned that several optional schemes with different orders of accuracy were implemented. For this reason, we only briefly present the basic methods related to the nesting procedure in this study. Readers interested in detailed numerical schemes are referred to Shi et al. (2012) and Choi et al. (2018). In the last paragraph of the numerical scheme subsection, we pointed out that the multi-grid interface is developed separately from the core program, and each grid in the nesting system runs the same core program for given initial and boundary conditions.

Because the parallelization scheme used in FUNWAVE-TVD strictly follows the MPI algorithm, especially the boundary data exchange method, we decided not to provide an extra figure to avoid duplication of this popular method already described in other documentations. We did provide some text to explain the data exchange through ghost cells. We hope the revision in this fashion is satisfactory.

3. Algorithms in section 3 are not introduced clearly. First, the restriction operator should be important, but I do not know what it is. Please provide an equation. Workload balance is easy in section 3.3, but what I am interested in is the data management. Could please provide more details regarding the shared memory and grid management? Last, figure 4 could be improved with condition judgement, details of grid/variables/boundary assignment.

Reply: In this revision, we provided a formulation for the restriction operator. In section 3.3, we gave more detailed descriptions about the shared memory/data management methods. Because this suggestion is closely consistent with reviewer 1's suggestion, we do not repeat the detailed revision here.

We modified figure 4 based on the suggestion.

4. Section 4, Applications. I understand that the authors mentioned the units

for figures. But it could be more straightforward to include this information along with the figure colorbar. In addition, I know that the present model has been verified with laboratory data. But it could be great to add a fine-grid simulation in section 4.1 with a single grid resolution of 1.25m and do the comparison. This way, it is clearer to demonstrate the effectiveness of the present work. Last, improve the axis labels of figures 15 and 16.

Reply: Following the suggestions, we redrew Figures 5, 7, 9, 15, and 16 with colorbar added and better look for axis labels. We carried out an extra test on the rectangular hump case using a single grid with a resolution of 1.25m. It turned out to be very interesting test showing a strong dispersion effect. The dispersive short waves appearing in the finest nested grid (1.25 m resolution) are consistent with the dispersive wave pattern from the single fine grid simulation. In the revision, we plotted the single grid result in a subplot of the original Figure 7 (Figure 6 in the revised version) and added an additional figure (Figure 7 in the revised version) showing detailed comparisons of surface elevation along a section. The original Figure 6 was removed according to question 30 in Technical Correction.

5. I'm personally interested in one question that, is the code suitable for grid refinement for two separated areas?

Reply: Thanks for your interest. The current version of the code cannot deal with two or more separate areas. However, it is feasible to add this feature in the MASTER program. This work should be included in the development of the adaptive mesh refinement algorithm as mentioned in the future work.

**Technical Correction:** (NOTE: minor corrections, such as typos, are not marked in red in the main text)

| No. | Location               | Comments                                                                                                                                                                              | Responses                                                                                                                                   |
|-----|------------------------|---------------------------------------------------------------------------------------------------------------------------------------------------------------------------------------|---------------------------------------------------------------------------------------------------------------------------------------------|
| 1   | Line 5-10              | Address format is not consistent                                                                                                                                                      | Corrected                                                                                                                                   |
| 2   | Line 14                | Cite the paper for FUNWAVE-TVD as there exists several versions.                                                                                                                      | Cited in main text                                                                                                                          |
| 3   | Line 16                | The nesting interface has more functions, like grid/memory management.                                                                                                                | Mentioned in later sentence                                                                                                                 |
| 4   | Line 17                | “child grids”                                                                                                                                                                         | We used singular because we mean between the two generations, a child grid could be a parent grid of next generation.                       |
| 5   | Line 19                | Remove comma in “data management, ”                                                                                                                                                   | Corrected                                                                                                                                   |
| 6   | Line 21                | “to verify the nesting algorithm, to assess model accuracy...”                                                                                                                        | Corrected                                                                                                                                   |
| 7   | Line 22                | “modeling” to “model”                                                                                                                                                                 | Corrected                                                                                                                                   |
| 8   | Line 35                | Remove “and accuracy”. Strategies in workload balance, data management, and parent-child communications does not guarantee accuracy.                                                  | Corrected                                                                                                                                   |
| 9   | Line 31-36             | I cannot find the advantage of the new interface here. At least, it should not be a repeat of the Abstract.                                                                           | We reworded the sentence. In fact, the language used in the abstract is close to the plain language.                                        |
| 10  | Line 45                | “are typically based on”                                                                                                                                                              | Corrected                                                                                                                                   |
| 11  | Line 47                | Remove “or” with “;”                                                                                                                                                                  | Corrected                                                                                                                                   |
| 12  | Line 48                | “, or on”                                                                                                                                                                             | Corrected                                                                                                                                   |
| 13  | Line 40 - 64           | This part has explained why using dispersive models. But, why do not choose the non-hydrostatic models?                                                                               | We clarified this by adding a sentence at the end of the paragraph.                                                                         |
| 14  | Line 79                | “coarse grid to the fine grid”, opposite?                                                                                                                                             | You are right. Corrected                                                                                                                    |
| 15  | Line 65 – 82           | The reason for two-way nesting is not clear. What if the feedback from fine grid to coarse grid is small? Provide some references. Somehow, this has been explained in lines 101-120. | We added the example of one-way nesting effect on edge wave motions appearing in the case of Crescent City Harbor (Tehrani-rad et al. 2020) |
| 16  | Line 150 - 167         | The prime work should be summarized here, not the objective.                                                                                                                          | Following the earlier suggestion, we moved this paragraph to section 2.1 and rewrote the summary at the end of this section.                |
| 17  | Line 171               | “the present study”                                                                                                                                                                   | Corrected                                                                                                                                   |
| 18  | Line 186 - 187         | “Governing equations” is good enough.                                                                                                                                                 | Corrected                                                                                                                                   |
| 19  | Between line 189 & 190 | Explain the dimensionless parameter mu.                                                                                                                                               | Added the definition.                                                                                                                       |
| 20  | Line 191               | “equation (4)”. Check the whole paper, please.                                                                                                                                        | We checked consistency over the entire text. We use parentheses only for equations                                                          |
| 21  | Line 232               | “two-way”                                                                                                                                                                             | Corrected                                                                                                                                   |
| 22  | Line 230 - 233         | Not necessary.                                                                                                                                                                        | Removed                                                                                                                                     |
| 23  | Line 246               | operators                                                                                                                                                                             | We use two terms, “interpolator”                                                                                                            |

|    |                         |                                                                                                                                                                                                                                                                                                                                      |                                                                                                                                                                                                                                                                                       |
|----|-------------------------|--------------------------------------------------------------------------------------------------------------------------------------------------------------------------------------------------------------------------------------------------------------------------------------------------------------------------------------|---------------------------------------------------------------------------------------------------------------------------------------------------------------------------------------------------------------------------------------------------------------------------------------|
|    |                         |                                                                                                                                                                                                                                                                                                                                      | and “restriction operator”. To avoid confusing, we changed interpolators in the text to interpolator to keep consistency                                                                                                                                                              |
| 24 | Line 247 - 256          | This can be explained in the end of Introduction, along with interpolator and restriction operators.                                                                                                                                                                                                                                 | We added in the introduction. Detailed formulas are given here.                                                                                                                                                                                                                       |
| 25 | Equation (10)           | Use symbols other than t and s as they are used for time and grid refinement ratio.                                                                                                                                                                                                                                                  | We corrected to a and b                                                                                                                                                                                                                                                               |
| 26 | Line 313                | “a time step”                                                                                                                                                                                                                                                                                                                        | Corrected                                                                                                                                                                                                                                                                             |
| 27 | Line 315                | “program is called”                                                                                                                                                                                                                                                                                                                  | Corrected                                                                                                                                                                                                                                                                             |
| 28 | Figure 4                | Explain the flowchart where a condition (two directions) is checked.                                                                                                                                                                                                                                                                 | We added conditions in the flowchart and defined ‘time’ and ‘grid level’ in the figure caption.                                                                                                                                                                                       |
| 29 | Equation above line 331 | Please add dimension.                                                                                                                                                                                                                                                                                                                | Added                                                                                                                                                                                                                                                                                 |
| 30 | Figure 6                | Four different lines are plotted but I can only distinguish part of them. Figure 6 is used to show that the evolution of elevation at four locations are almost the same, but this can be explained in the text without an extra figure. Or, if the accuracy is important, why not adding information about the relative difference? | Removed the figure.                                                                                                                                                                                                                                                                   |
| 31 | Figure 10               | Some figures use (a), but this figure uses (1)-(8)                                                                                                                                                                                                                                                                                   | We re-plotted several figures with a consistent (a) type                                                                                                                                                                                                                              |
| 32 | Line 393-394            | If the test 4.2 is not a typical case for demonstrating the efficiency of the nested grid method, could you give us a good demonstration as the I regard the computational efficiency is very important. Also, it will be a great promotion of this work.                                                                            | In the text, we pointed out that the Tohoku-Oki case is a typical case for demonstrating the efficiency of the present grid nesting framework. We emphasized its automatic nesting procedure versus the labor-intensive pre-and post-processing procedures in the old nesting method. |
| 33 | Line 512 - 513          | Not necessary.                                                                                                                                                                                                                                                                                                                       | We rewrote the future work. We mentioned GPU because it may be our next major task supported by the funding agency.                                                                                                                                                                   |
| 34 | Line 533                | Please check the full references.<br>Geophysical Research: Oceans, 122(12)                                                                                                                                                                                                                                                           | Corrected                                                                                                                                                                                                                                                                             |
| 35 | Line 538                | Geophysical Research Letters, 41                                                                                                                                                                                                                                                                                                     | Corrected                                                                                                                                                                                                                                                                             |
| 36 | Line 541                | “Tech. rep.”, abbreviation?                                                                                                                                                                                                                                                                                                          | Corrected                                                                                                                                                                                                                                                                             |
| 37 | Line 544                | Hawaii                                                                                                                                                                                                                                                                                                                               | Corrected                                                                                                                                                                                                                                                                             |
| 38 | Line 568                | 49                                                                                                                                                                                                                                                                                                                                   | The issue is `49-50’                                                                                                                                                                                                                                                                  |
| 39 | Line 637                | Fuhrman, D. R. (space)                                                                                                                                                                                                                                                                                                               | Corrected                                                                                                                                                                                                                                                                             |
| 40 | Line 657                | Space after doi:                                                                                                                                                                                                                                                                                                                     | Corrected                                                                                                                                                                                                                                                                             |
| 41 | Line 660                | 43                                                                                                                                                                                                                                                                                                                                   | Issue is `43-44’                                                                                                                                                                                                                                                                      |
| 42 | Line 661 – 663          | Style is not consistent with Kirby et al. (1998)                                                                                                                                                                                                                                                                                     | Corrected                                                                                                                                                                                                                                                                             |
| 43 | Line 670 - 672          | Style is wrong                                                                                                                                                                                                                                                                                                                       | Corrected                                                                                                                                                                                                                                                                             |
| 44 | Line 674                | doi: (lower case and space)                                                                                                                                                                                                                                                                                                          | Corrected                                                                                                                                                                                                                                                                             |

|    |                   |                            |           |
|----|-------------------|----------------------------|-----------|
| 45 | Line<br>684 - 685 | could be a research report | Corrected |
|----|-------------------|----------------------------|-----------|

**Again, we would like to express our appreciation for the reviewer who provided such detailed comments/suggestions.**
